# Supplementary material for: Restrained light-soaking and reduced hysteresis in perovskite solar cells employing a helical perylene diimide interfacial layer
Source: Royal Society of Chemistry journal article supplement (doi:10.1039/c8ta02584c), 2018-01-01
Supplement: c8ta02584c1.pdf [file c8ta02584c1.pdf]

## Restrained light-soaking and reduced hysteresis in perovskite solar cells employing a helical perylene diimide interfacial layer

Liyan Yang<sup>a,b,#</sup>, Mingliang Wu<sup>b,c,#</sup>, Feilong Cai<sup>a,b</sup>, Pang Wang<sup>a,b</sup>, Robert S. Gurney<sup>a,b</sup>, Dan Liu<sup>a,b</sup>, Jianlong Xia<sup>c,\*</sup>, Tao Wang<sup>a,b,\*</sup>

<sup>a</sup> State Key Laboratory of Silicate Materials for Architectures, Wuhan University of Technology, Wuhan, 430070, China

<sup>b</sup> School of Materials Science and Engineering, Wuhan University of Technology, Wuhan, 430070, China

<sup>c</sup> School of Chemistry, Chemical Engineering and Life Science, Wuhan University of Technology, Wuhan, 430070, China

<sup>#</sup> These authors contribute equally to this work.

\* E-mail: twang@whut.edu.cn; jlxia@whut.edu.cn

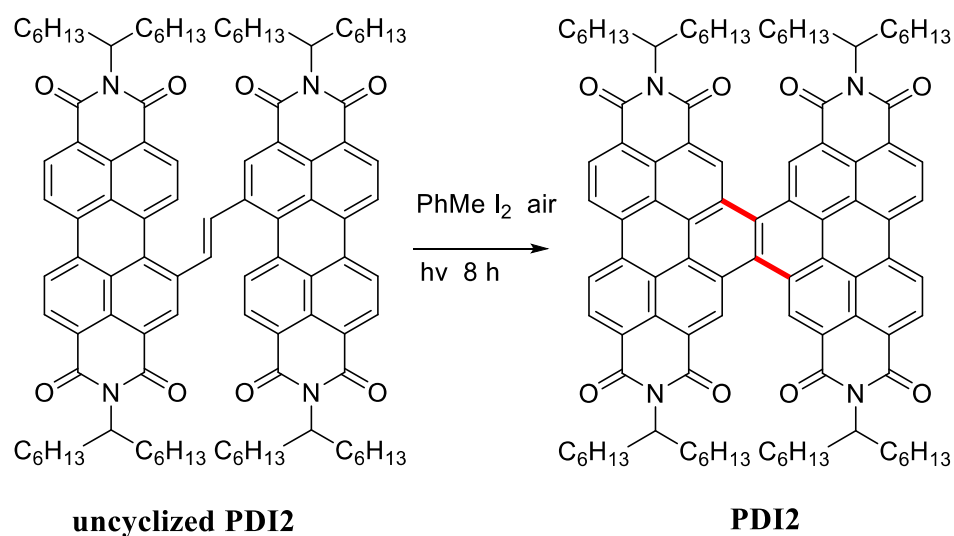

**Fig. S1.** The uncyclized PDI2 (500 mg, 0.326 mmol), which was synthesized by referring to previous literature procedure,<sup>1,2</sup> was dissolved in 300 mL toluene in a 500ml round bottom flask, and iodine (100 mg) was added. The reacting mixture solution was drawn into a home-built flow reactor (equipped with four 450 W-mercury lamps). The purple reaction mixture was turned to orange red after pumped through the flow reactor twice with a retention time of ~8 hours. The solvent was removed using vacuum rotary evaporator and the crude residue was washed with methanol to remove excessive iodine. The crude red solid was purified with silica gel (eluent: petroleum ether/dichloromethane) and recrystallization from hexane, then the final product PDI2 was obtained as a red solid (440 mg, 88%).

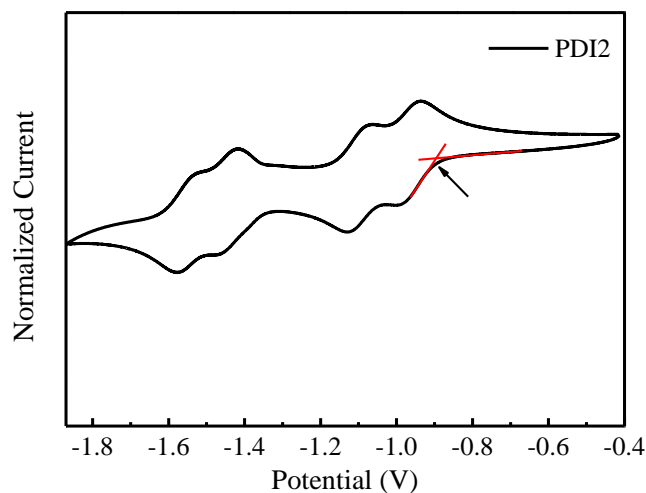

**Fig. S2** Cyclic voltammograms (CVs) of PDI2 (versus Fc/Fc<sup>+</sup>). The LUMO levels were calculated by the following equations:  $E_{\text{LUMO}} = - (E_{\text{red}} - E_{\text{Fc}} + 4.8) \text{ eV}$ , where  $E_{\text{red}}$  results were obtained from the onset of reduction, respectively, while  $E_{\text{Fc}}$  was the half-wave potential of ferrocene. The optical bandgap was estimated from the onset positions of the absorption spectra and calculated by the equation:  $E_{\text{g}} = 1240/\lambda_{\text{onset}}$ . Where the  $\lambda_{\text{onset}}$  is 576 nm. So the calculated  $E_{\text{g}}$  is 2.15 eV. It was measured that the  $E_{\text{red}} - E_{\text{Fc}} = -0.89 \text{ eV}$ . So the  $E_{\text{LUMO}} = - (E_{\text{red}} - E_{\text{Fc}} + 4.8) \text{ eV} = -3.91 \text{ eV}$ ,  $E_{\text{HOMO}} = -6.06 \text{ eV}$ .

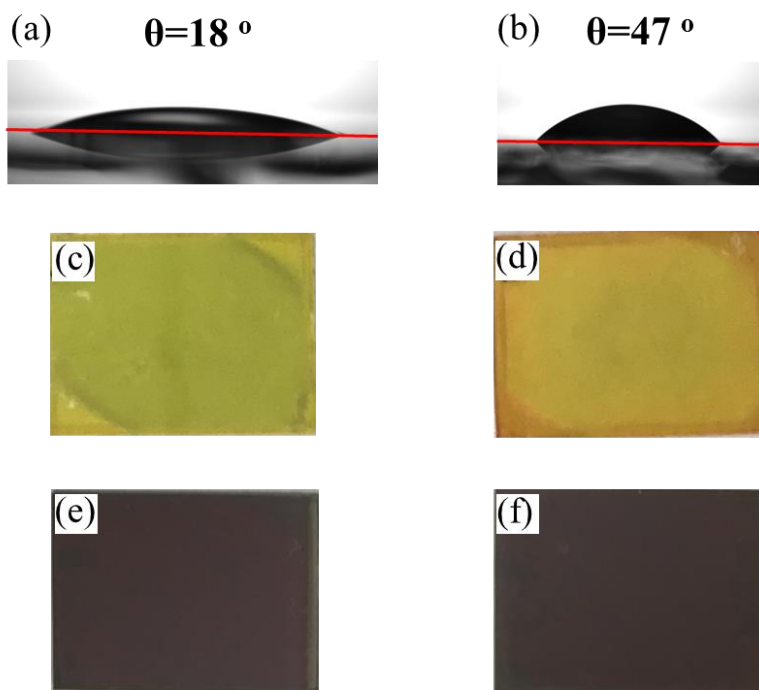

**Fig. S3** The contact angle of mixed solvent of DMF and DMSO (9:1) on (a) TiO<sub>2</sub> and (b) TiO<sub>2</sub>/PDI2 surfaces. The PbI<sub>2</sub> films cast on (c) TiO<sub>2</sub> and (d) TiO<sub>2</sub>/PDI2 surfaces, and perovskite films on (e) TiO<sub>2</sub> and (f) TiO<sub>2</sub>/PDI2 surfaces.

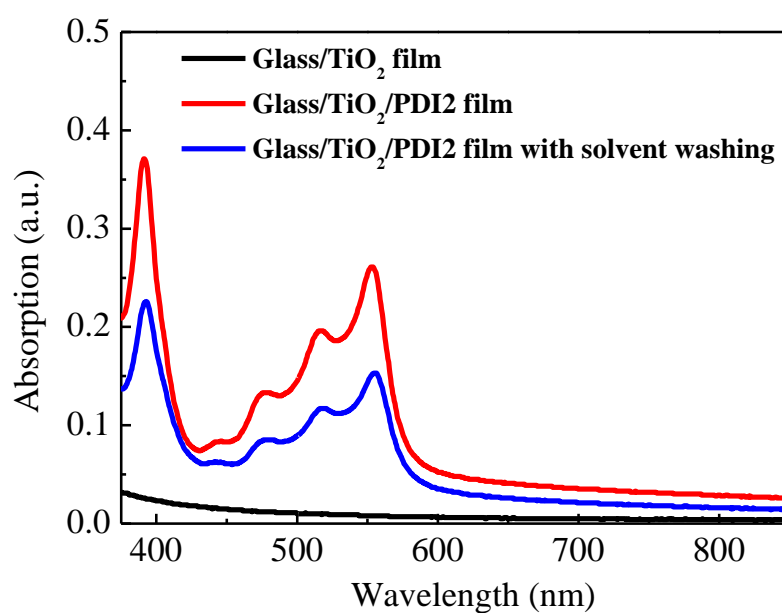

**Fig. S4** The absorption of TiO<sub>2</sub> film on glass, and PDI2 film coated on glass/TiO<sub>2</sub> before and after washing with mixed solvents of DMF and DMSO (9:1)

**Table S1** Device metrics of perovskite solar cells w/o PDI2 interlayer upon continuous illumination.

| ETLs                   | Light soaking<br>time (s) | Scan<br>direction | PCE<br>(%) | Jsc (mA/cm <sup>2</sup> ) | Voc<br>(V) | FF<br>(%) |
|------------------------|---------------------------|-------------------|------------|---------------------------|------------|-----------|
| TiO <sub>2</sub>       | 0                         | Forward<br>scan   | 10.38      | 23.27                     | 0.93       | 48.15     |
|                        | 20                        |                   | 12.80      | 23.22                     | 0.98       | 56.33     |
|                        | 40                        |                   | 12.87      | 23.17                     | 0.99       | 55.90     |
|                        | 0                         | Reverse<br>scan   | 16.40      | 23.30                     | 1.04       | 67.77     |
|                        | 20                        |                   | 18.86      | 23.16                     | 1.09       | 74.46     |
|                        | 40                        |                   | 19.33      | 23.25                     | 1.09       | 75.93     |
|                        | 0                         | Forward<br>scan   | 17.13      | 23.19                     | 1.06       | 69.94     |
|                        | 20                        |                   | 17.28      | 23.18                     | 1.06       | 70.63     |
|                        | 40                        |                   | 17.50      | 23.17                     | 1.06       | 71.68     |
| TiO <sub>2</sub> /PDI2 | 0                         | Reverse<br>scan   | 19.08      | 23.25                     | 1.07       | 76.82     |
|                        | 20                        |                   | 19.76      | 23.32                     | 1.07       | 79.21     |
|                        | 40                        |                   | 19.84      | 23.30                     | 1.07       | 79.52     |

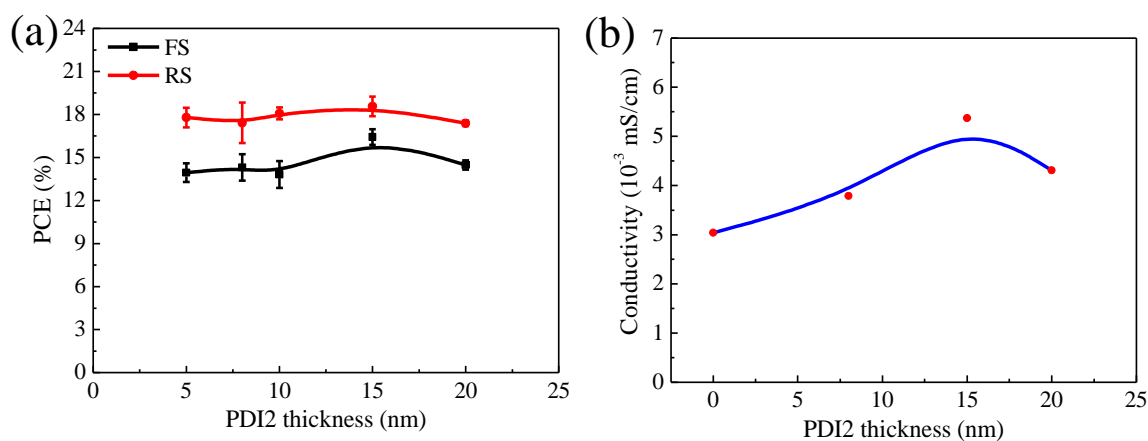

**Fig. S5** (a) The PCE of perovskite solar cells with varying thickness of the PDI2 interlayer from forward and reverse scans. (b) PDI2 conductivity as a function of thickness. The electrical conductivity ( $\sigma$ ) was determined from devices structure of ITO/TiO<sub>2</sub>/PDI2/Ag, by using  $J=\sigma L^{-1}V$ , where  $L$  is the thickness.

## References

- 1 Y. Zhong, M. T. Trinh, R. Chen, W. Wang, P. P. Khlyabich, B. Kumar, Q. Xu, C.-Y. Nam, M. Y. Sfeir, C. Black, M. L. Steigerwald, Y.-L. Loo, S. Xiao, F. Ng, X.-Y. Zhu and C. Nuckolls, *J. Am. Chem. Soc.*, 2014, **136**, 15215.
- 2 Y. Zhong, B. Kumar, S. Oh, M. T. Trinh, Y. Wu, K. Elbert, P. Li, X. Zhu, S. Xiao, F. Ng, M. L. Steigerwald and C. Nuckolls, *J. Am. Chem. Soc.*, 2014, **136**, 8122.
